# Supplementary material for: Cryo-EM structures of inhibitory antibodies complexed with arginase 1 provide insight into mechanism of action
Source: PubMed Central journal article supplement (PMC8322407; doi:10.1038/s42003-021-02444-z), 2021-07-29
Supplement: 42003_2021_2444_MOESM2_ESM.pdf [file 42003_2021_2444_MOESM2_ESM.pdf]

1 **Cryo-EM structures of inhibitory antibodies complexed with Arginase 1 provide**  
2 **insight into mechanism of action.**

3 \*Rachel L. Palte<sup>1</sup>, Veronica Juan<sup>2</sup>, Yacob Gomez-Llorente<sup>3</sup>, Marc Andre Bailly<sup>2</sup>, Kalyan  
4 Chakravarthy<sup>4†</sup>, Xun Chen<sup>3</sup>, Daniel Cipriano<sup>2</sup>, Laurence Fayadat-Dilman<sup>2</sup>, Symon Gathiaka<sup>1</sup>, Heiko  
5 Greb<sup>2</sup>, Brian Hall<sup>5</sup>, Mas Handa<sup>2</sup>, Mark Hsieh<sup>2</sup>, Esther Kofman<sup>2</sup>, Heping Lin<sup>5</sup>, J. Richard Miller<sup>4</sup>,  
6 Nhung Nguyen<sup>2</sup>, Jennifer O'Neil<sup>6‡</sup>, Hussam Shaheen<sup>5§</sup>, Eric Sterner<sup>5</sup>, Corey Strickland<sup>3</sup>, Angie Sun<sup>5</sup>,  
7 Shane Taremi<sup>5^</sup>, Giovanna Scapin<sup>3±</sup>

8  
9 **Affiliations**

10 1 Department of Discovery Chemistry, Merck & Co., Inc., Boston, MA, USA  
11 2 Department of Discovery Biologics, Merck & Co., Inc., South San Francisco, CA, USA  
12 3 Department of Discovery Chemistry, Merck & Co., Inc., Kenilworth, NJ, USA  
13 4 Department of Discovery Biology, Merck & Co., Inc., Boston, MA, USA  
14 5 Department of Discovery Biologics, Merck & Co., Inc., Boston, MA, USA  
15 6 Department of Discovery Oncology, Merck & Co., Inc., Boston, MA, USA  
16 \* Corresponding author ([rachel.kubiak@merck.com](mailto:rachel.kubiak@merck.com))  
17 † Present address: Ipsen Bioscience Inc., Cambridge, MA, USA  
18 ‡ Present address: Xilio Therapeutics, Waltham, MA, USA  
19 § Present address: Pandion Therapeutics – a wholly owned  
20 ^ Present address: 155 Brookline St, #9, Cambridge, MA, USA  
21 ± Present address: Nanolmaging Services, Woburn, MA, USA  
22  
23

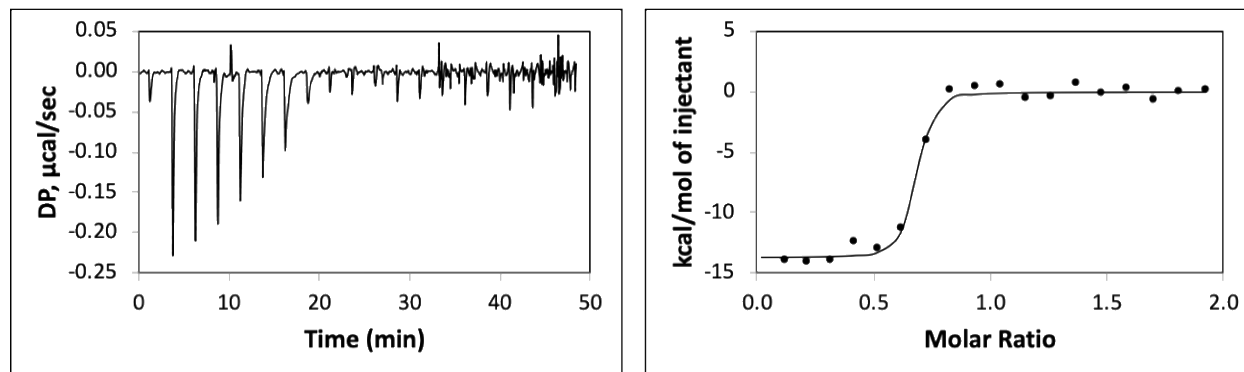

24  
25 **SI Figure 1. Isothermal Titration Calorimetry Assay results.** The calculated stoichiometry  
26  $n=0.637$  is consistent with 2:3 ratio of [hArg1]:[mAb].  
27

28  
29  
30  
31  
32  
33  
34  
35  
36  
37  
38  
39  
40  
41  
42

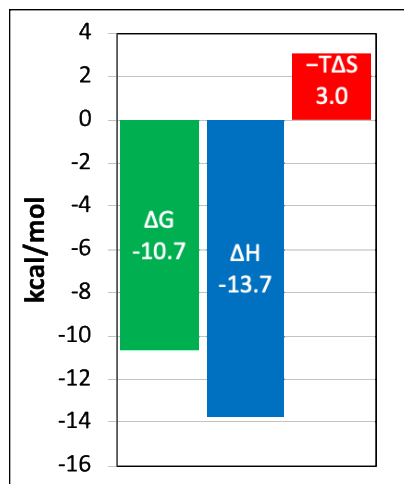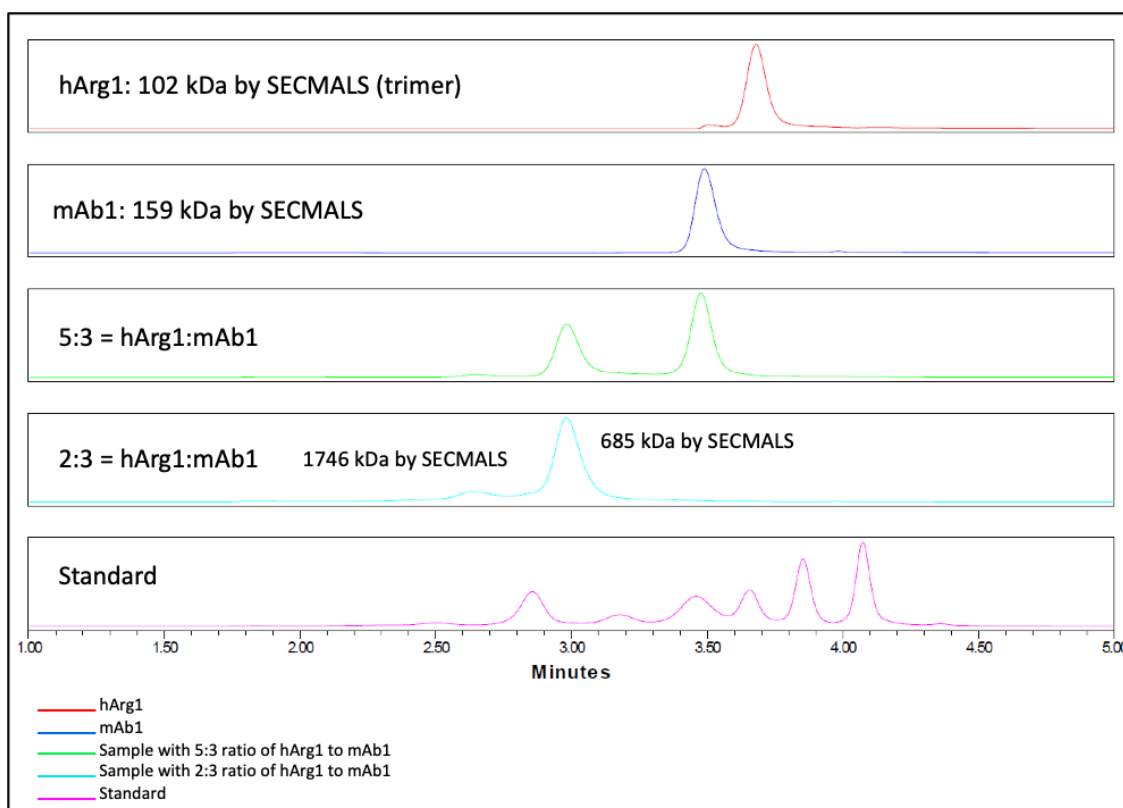

67  
68  
69  
70  
71  
72  
73  
74  
75  
76  
77  
78

| Name    | Description         | Calculated MW (Da) | MW SEC MALS (Da) |
|---------|---------------------|--------------------|------------------|
| control | hArg1 Trimer        | 104,205            | 102,000          |
| mAb1    | Anti-hArg1 antibody | 147,075            | 159,000          |

**SI Figure 2. SEC-MALS results of hArg1 with mAb1 in two ratios.** These results verify that the best fit for the hArg1:mAb1 ratio is 2:3.

79 **SI Table 1: summary of cryo-EM data collection**

| Sample                   | mAb1         | mAb2         | mAb4         | mAb3         | mAb5         |
|--------------------------|--------------|--------------|--------------|--------------|--------------|
| Microscope               | Krios/EF     | Krios/EF     | Krios/EF     | Krios/EF     | Krios/EF     |
| Camera                   | K2           | K2           | K2           | K2           | K2           |
| Pixel size (Å/pix)       | 1.04         | 1.04         | 1.04         | 1.04         | 1.04         |
| Dose (e <sup>-</sup> /Å) | 45.46        | 44.32        | 44.47        | 44.47        | 45.44        |
| #images                  | 1172         | 778          | 1166         | 1046         | 2048         |
| Defocus range (μm)       | -1.0 to -1.8 | -1.2 to -2.0 | -1.0 to -2.0 | -1.0 to -2.0 | -1.0 to -2.0 |
| Date                     | 30-May-2018  | 13-Jun-2018  | 15-Aug-2018  | 14-Aug-2018  | 10-Sep-2018  |

80  
81  
82  
83

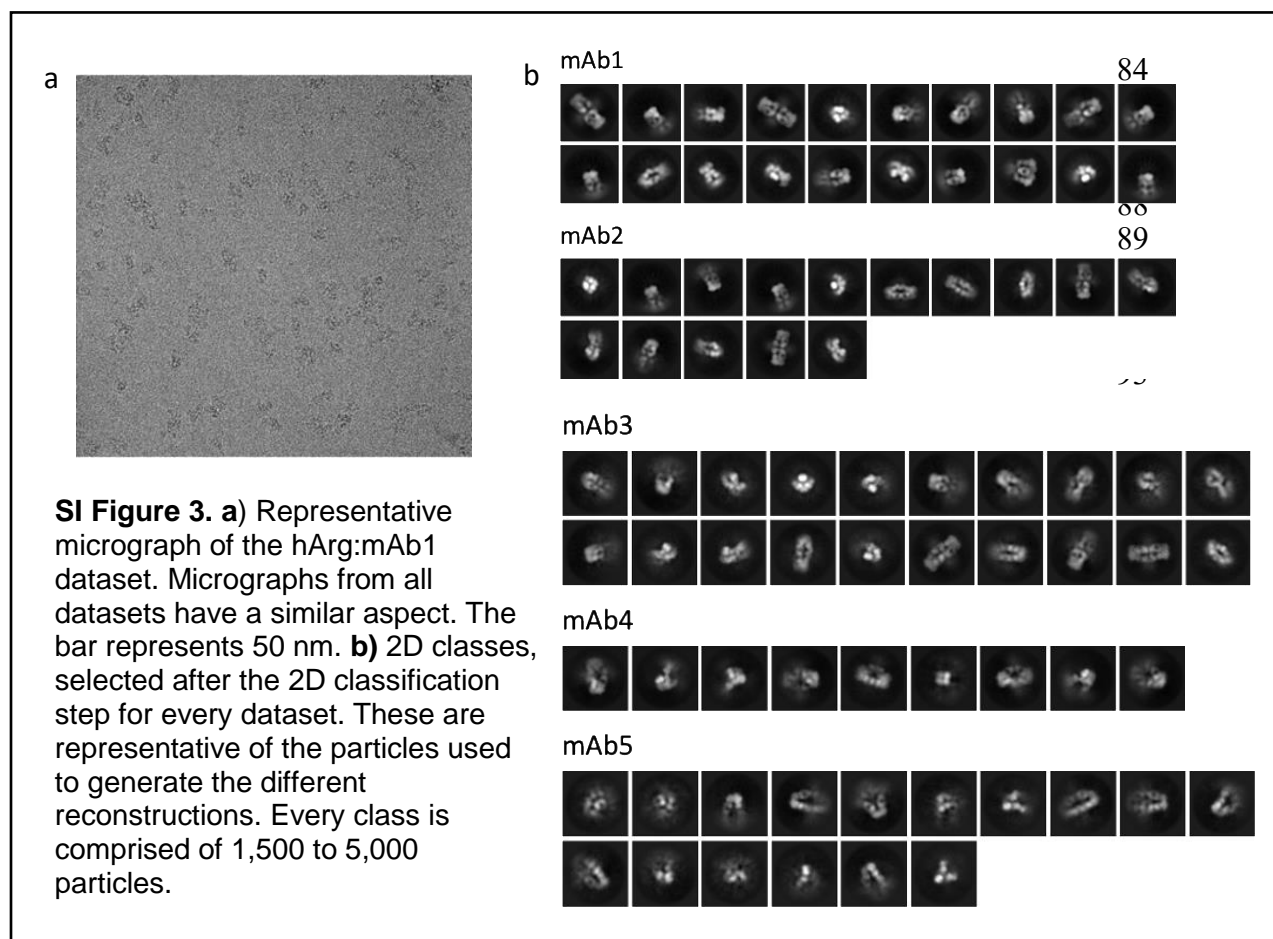

94  
95  
96  
97  
98  
99

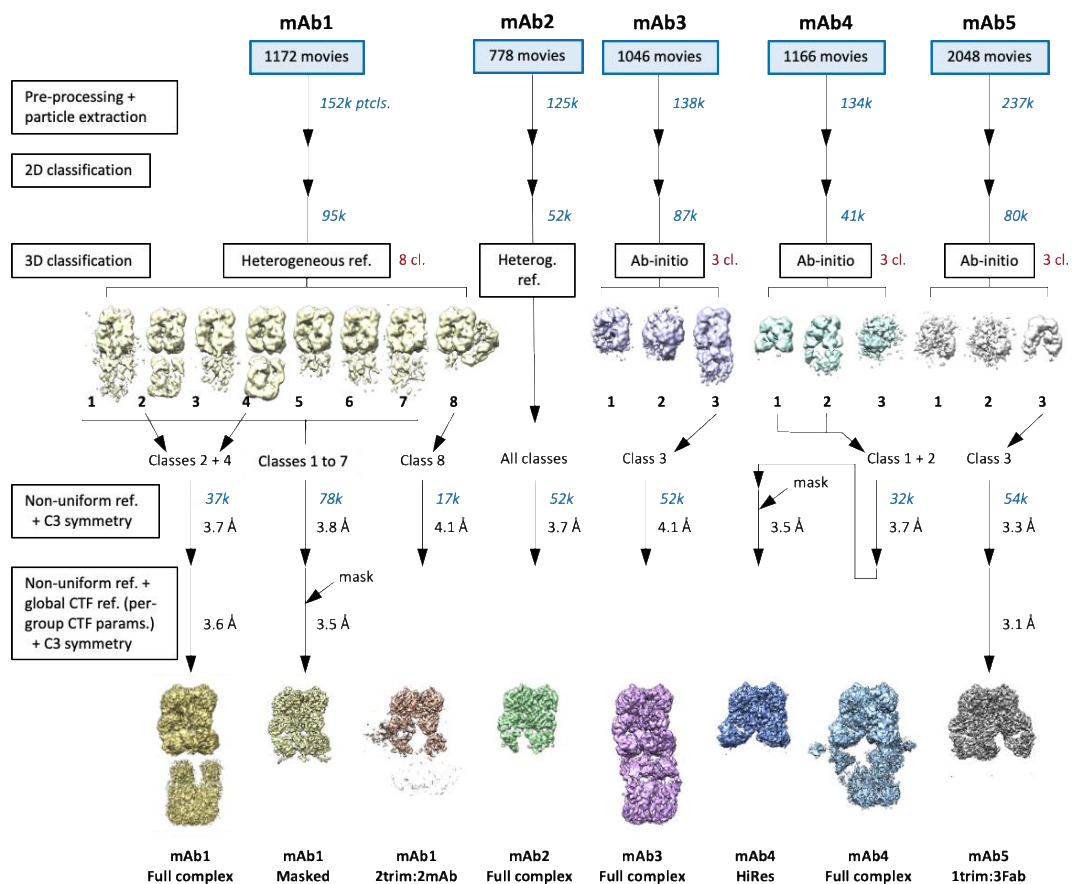

**SI Figure 4.** Summary of main processing steps for the cryo-EM datasets to generate each of the final reconstructions. The number of particles (in thousands) involved in every step of the processing is indicated in blue italic letters for the steps of particle extraction, particle selection after 2D classification, and 3D refinement. The number of classes for 3D classification step (either by heterogenous refinement or ab-initio) is indicated in red letters when necessary. Global CTF refinement successfully improved the final resolution in the cases of the “mAb1 full complex”, “mAb1 masked” and “mAb5 1 trimer:3 Fabs” reconstructions. The map for the “mAb2 full complex” is represented at a lower threshold, for clarity purposes. As a consequence, the second trimer of the map is not displayed in this representation. Additionally, some repetitive steps of the processing have been omitted from this summary for clarity purposes.

100  
101  
102  
103  
104  
105  
106  
107  
108  
109

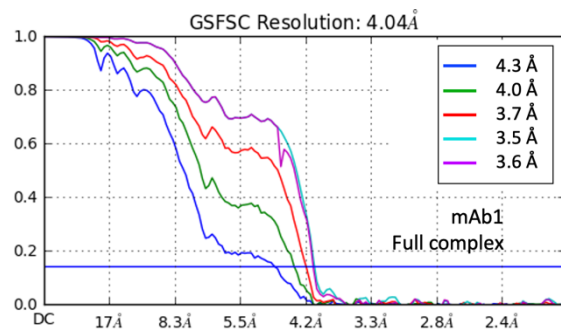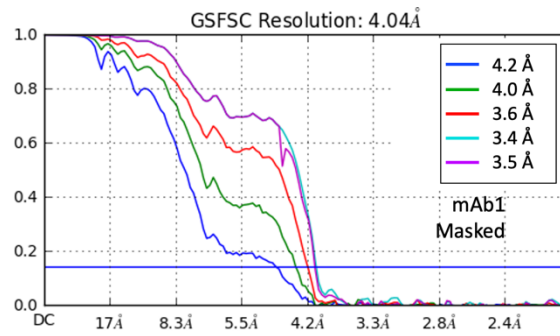

110

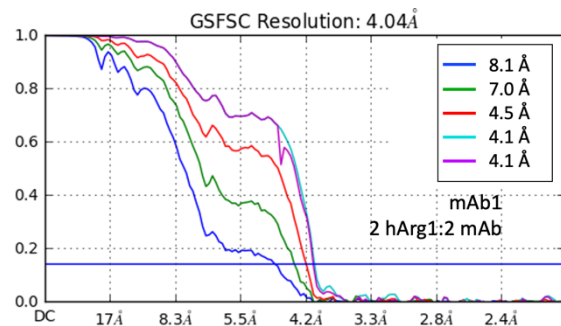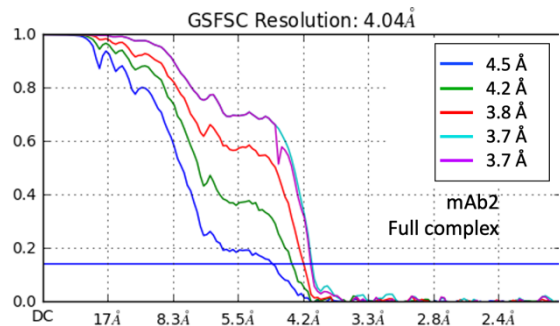

111

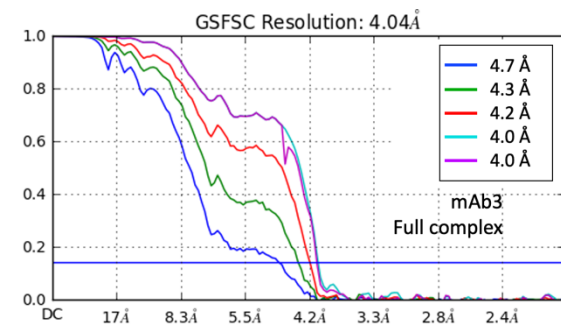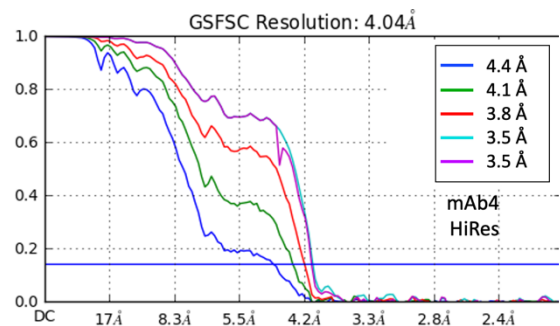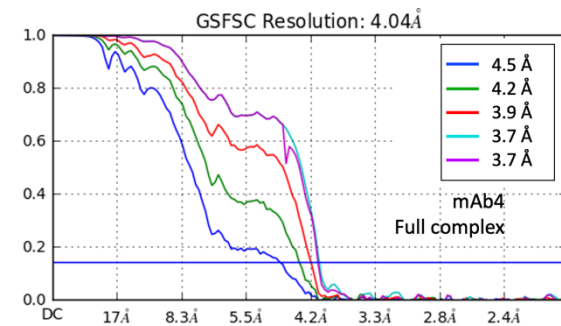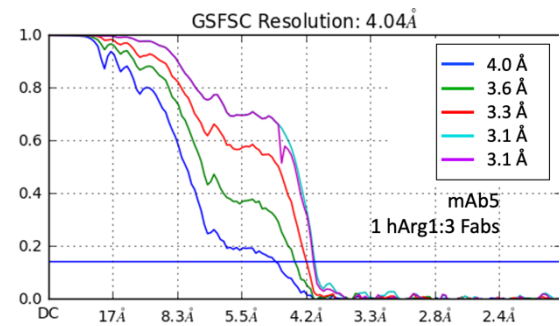

112

113  
114  
115  
116  
117  
118  
119  
120

**SI Figure 5.** Gold-standard Fourier-shell correlation curves for each of the 8 reconstructions. The value of the “corrected” calculation plot at the 0.143 threshold is indicated. Line colors are: blue = no mask; green = spherical; red = loose, cyan = tight; and corrected = purple.

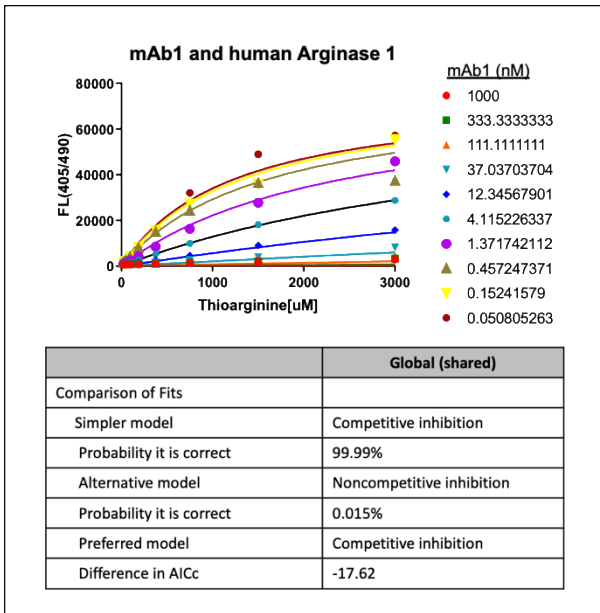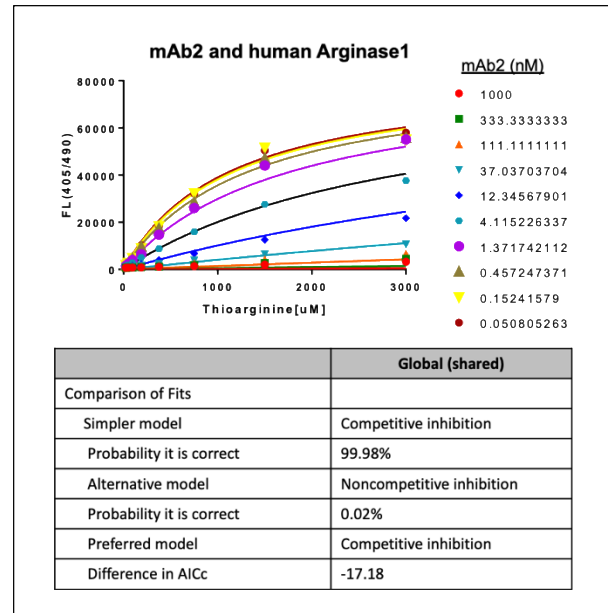

122  
123  
124  
125  
126  
127  
128  
129  
130  
131  
132  
133  
134  
135  
136  
137  
138  
139  
140  
141  
142  
143  
144  
145  
146  
147  
148  
149  
150  
151  
152

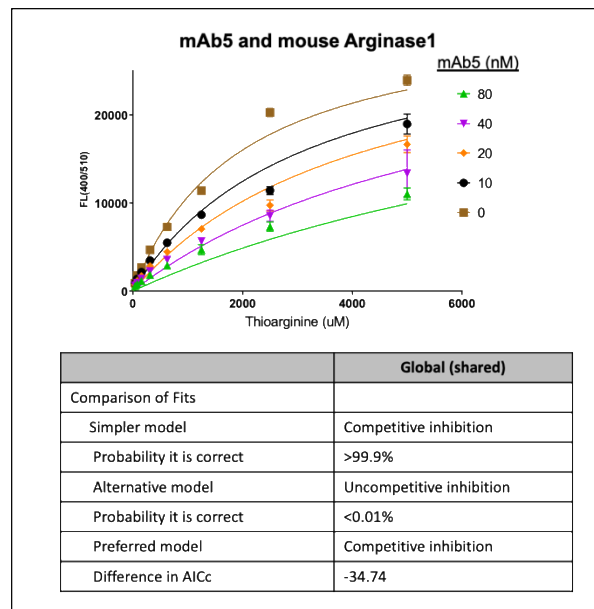

**SI Figure 6.** Graphs showing the competitive inhibition profile of mAb1 and mAb2 against human Arg1 and mAb5 against mouse Arg1.

153  
 154  
 155  
 156  
 157  
 158  
 159  
 160  
 161  
 162  
 163  
 164  
 165  
 166  
 167  
 168  
 169  
 170  
 171  
 172  
 173  
 174  
 175  
 176  
 177  
 178  
 179  
 180  
 181  
 182  
 183  
 184  
 185  
 186  
 187  
 188  
 189  
 190  
 191

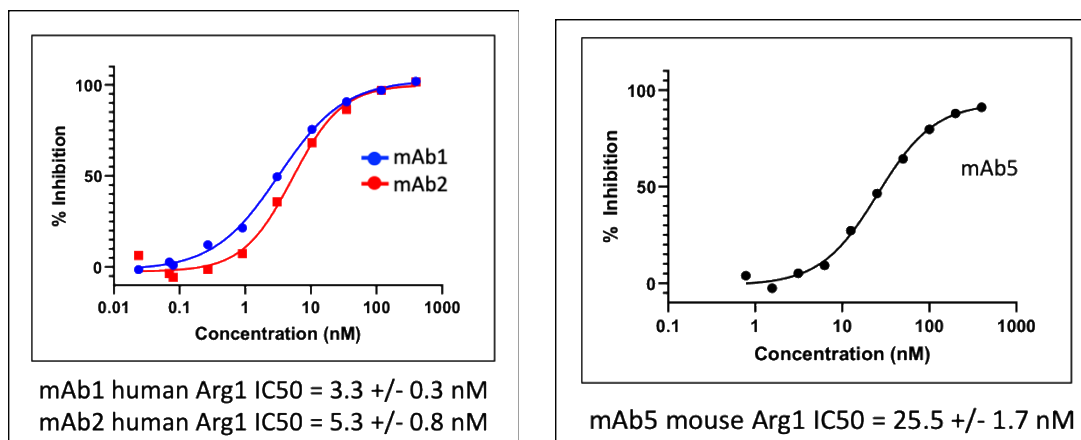

SI Figure 7. Dose response curves as determined by LCMS (mAb1 and mAb2) and TOGA (ThioOrnithine Generation Assay) (mAb5).

SI Table 2. Surface area, hydrogen bonds, and salt bridges between antibodies and hArg1.

| antibody  | Arg1 monomer | Antibody chain | Surface area (Å <sup>2</sup> ) | # Hydrogen bonds | salt bridges |
|-----------|--------------|----------------|--------------------------------|------------------|--------------|
| mAb1-mAb3 | MonA         | HC             | 372                            | 3                | 1            |
|           | MonB         | LC             | 366                            | 4                | 0            |
|           | MonB         | HC             | 654                            | 9                | 0            |
| mAb4      | MonA         | HC             | 604                            | 4                | 1            |
|           | MonA         | LC             | 370                            | 2                | 1            |
|           | MonB         | LC             | 531                            | 3                | 5            |
|           | MonB         | HC             | 45                             | 0                | 0            |
| mAb5      | MonA         | HC             | 634                            | 8                | 5            |
|           | MonA         | LC             | 274                            | 3                | 0            |

SA calcs done with PISA<sup>11</sup>

192 **SI Table 3: Epitope interactions of mAb1, mAb2, and mAb3 with hArg1 paratope.**

193

| Heavy Chain                                                                                            | hArg1 monomer A                                                                                                                                                                              |
|--------------------------------------------------------------------------------------------------------|----------------------------------------------------------------------------------------------------------------------------------------------------------------------------------------------|
| Tyr54<br>Gly56<br>Thr69<br>Thr72, Asp73<br>Thr74<br>Ser75                                              | Lys39<br>Thr290<br>Pro286<br>Lys33<br>Lys33, Ala34, Gly35, Glu38<br>Arg32, Glu38                                                                                                             |
| Light Chain                                                                                            | hArg1 monomer B                                                                                                                                                                              |
| Ser28<br>Tyr32<br>Ser67<br>Ser92<br>Leu93                                                              | Glu25<br>Ser16, Lys17, Asn69<br>Asp57<br>Pro20, Gly22<br>Ser281                                                                                                                              |
| Heavy Chain                                                                                            | hArg1 monomer B                                                                                                                                                                              |
| Tyr54<br>Asn57*, Thr58<br>Asn59"<br>Tyr102<br>Gly103<br>Tyr104<br>Arg105<br>Ser106<br>Pro107<br>Tyr108 | Asp181<br>Lys284<br>Arg21<br>Pro20, Arg21<br>Thr246<br>His126, Asp128, Asn130, Ser137, His141, Gly142, Asp183, Glu186<br>Thr136, Asp183<br>Ser137<br>Thr136, Ser137<br>Lys68, Ser137, Asn139 |

194 All interactions shown here are within 4 Å

195 \*Asn57 on mAb1 on mAb2; Glu57 on mAb3

196 "Asn59 on mAb1 on mAb2; His59 on mAb3

197

198

199

200

201

202

203

204

205

206

207

208

209

210

211

212

213

214

215

216

217

218



219 **SI Table 4: Interactions between mAb4 epitope with hArg1 paratope.**

220

| <b>Light Chain</b>                                                                                             | <b>hArg1 monomer A</b>                                                                                                                                    |
|----------------------------------------------------------------------------------------------------------------|-----------------------------------------------------------------------------------------------------------------------------------------------------------|
| Asn31<br>Asp32<br>Lys49<br>Tyr50<br>Gln53<br>Asn92                                                             | Glu42<br>Lys39<br>Glu38<br>Lys33, Ala34, Gly35, Glu38,<br>Glu38, Lys41<br>Lys39, Glu287, Thr290, Asn294                                                   |
| <b>Heavy Chain</b>                                                                                             | <b>hArg1 monomer A</b>                                                                                                                                    |
| Thr30, Asp31<br>Tyr33<br>Val50, Ser52<br>Tyr54<br>Asn55<br>Gly57<br>Thr59<br>Asp99, Leu100<br>Tyr101<br>Tyr102 | Glu26<br>Lys33, Pro280<br>Pro286<br>Glu26, Ser281<br>Gly283<br>Lys284, Thr285, Pro286<br>Pro286, Glu287<br>Lys33<br>Lys33, Ala34, Thr290, Val293<br>Glu38 |
| <b>Light Chain</b>                                                                                             | <b>hArg1 monomer B</b>                                                                                                                                    |
| Glu1<br>Val3<br>Arg24<br>Ser26<br>Gln27<br>Arg28<br>Asp70<br>Trp94                                             | Arg21<br>Arg21<br>Lys68<br>Arg21<br>Gly245, Pro247<br>Asp181, Val182, Asp183, Pro184<br>Thr136<br>Lys284                                                  |

221 All interactions shown here are within 4 Å

222

223

224

225

226

227

228

229

230

231

232

233

234

235

236

237

238

239

240

241

242

243 **SI Table 5: Interactions between mAb5 epitope and hArg1 paratope.**

244

| Light Chain  | hArg1 monomer A                                 |
|--------------|-------------------------------------------------|
| Ser30        | Pro54, Phe55                                    |
| Asn31        | Asp57                                           |
| Tyr32        | Phe55, Asp57                                    |
| Ser49        | Pro59                                           |
| Ala50        | Asp57, Pro59                                    |
| Thr53        | Pro59, Asn60                                    |
| Tyr91        | Asp57                                           |
| Heavy Chain  | hArg1 monomer A                                 |
| Asp30, Asp31 | Arg21                                           |
| Asn52, Gly55 | Ser281                                          |
| Trp53        | Arg21, Gly22                                    |
| Asn54        | Ser281, Leu282                                  |
| Ser57        | Glu26                                           |
| Arg100       | Pro59                                           |
| Arg101       | Lys17, Asp57, Ile58, Pro59                      |
| Arg102       | Pro20, Arg21, Lys68                             |
| Gly103       | Arg21, Gly22                                    |
| Tyr105       | Ser16, Lys17, Gln19, Pro20, Gly22, Glu25, Asn69 |
| Gly106       | Glu25                                           |

245 All interactions shown here are within 4 Å

246 **SI Table 6. SPR data for mAb3 and mAb4 affinities for monomeric and trimeric hArg1**

| Human Arg1 - trimeric  |                       |                        |                               |                         |
|------------------------|-----------------------|------------------------|-------------------------------|-------------------------|
| Antibody               | ka (1/Ms)             | kd (1/s)               | KD (M)                        | STD KD (M)              |
| mAb3                   | 1.7 x 10 <sup>6</sup> | 1.2 x 10 <sup>-3</sup> | <b>0.74 x 10<sup>-9</sup></b> | 8.9 x 10 <sup>-11</sup> |
| mAb4                   | 2.9 x 10 <sup>5</sup> | 1.6 x 10 <sup>-4</sup> | <b>0.56 x 10<sup>-9</sup></b> | 5.7 x 10 <sup>-11</sup> |
| Human Arg1 - monomeric |                       |                        |                               |                         |
| Antibody               | ka (1/Ms)             | kd (1/s)               | KD (M)                        | STD KD (M)              |
| mAb3                   | <b>No binding</b>     |                        |                               |                         |
| mAb4                   | 3.9 x 10 <sup>5</sup> | 7.6 x 10 <sup>-3</sup> | <b>20.0 x 10<sup>-9</sup></b> | 6.8 x 10 <sup>-11</sup> |

247  
248  
249  
250  
251  
252  
253  
254  
255  
256  
257  
258  
259  
260  
261  
262  
263  
264  
265  
266  
267  
268  
269  
270  
271  
272  
273  
274  
275  
276  
277  
278  
279  
280  
281  
282  
283  
284  
285  
286  
287  
288  
289  
290  
291  
292  
293  
294  
295  
296

297 **Supplementary note 1: Comparison of complex sizes and shapes**

298 When considering the overall shape and size of the complexes (**SI Figure 8a**), it is clear  
299 that some of these differences are due to the varying backbone characteristics as described  
300 above. However, the epitope of the antibody is responsible for determining how and where the  
301 antibody binds to the hArg1 trimer which also plays a role in the antibody orientation and therefore  
302 the overall complex shape. In mAbs1-3 the epitope is at the very tip of the antibody (**SI Figure**  
303 **8b**) with the HC accounting for the majority of the interactions with hArg1, resulting in the Fab  
304 binding almost perpendicular to the hArg1 trimer. Considering that cryoEM, ITC, and SEC-MALS  
305 data confirm the presence of the 2:3 complexes, the conformation of the mAbs binding to both  
306 the top and bottom halves of these complexes results in the antibodies taking on an almost T-  
307 shape appearance in which the angle of the backbone is  $\sim 150^\circ$  degrees. This results in an  
308 elongated complex approximately 230 Å in length. In contrast, mAb4 has mostly LC interactions  
309 with the hArg1 trimer and binds in such a way that the Fab is splayed slightly outwards resulting  
310 in a shorter ( $\sim 195$  Å long) complex with a visibly smaller angle in the mAb backbone and a more  
311 rounded appearance. Lastly, mAb5 is unique among the five antibodies in that no second trimer  
312 is seen in electron density maps. The antibody interacts with hArg1 mainly through its HC, and  
313 with no specific orientation needed for the mAbs to also bind a second trimer, the backbone angle  
314 and overall length of the complex is difficult to compare. The length of the top half of the complex  
315 can be measured at  $\sim 110$ - $115$  Å including the hArg1 trimer, and the complex seems to take on  
316 an even rounder appearance as compared to mAbs1-4.

317  
318

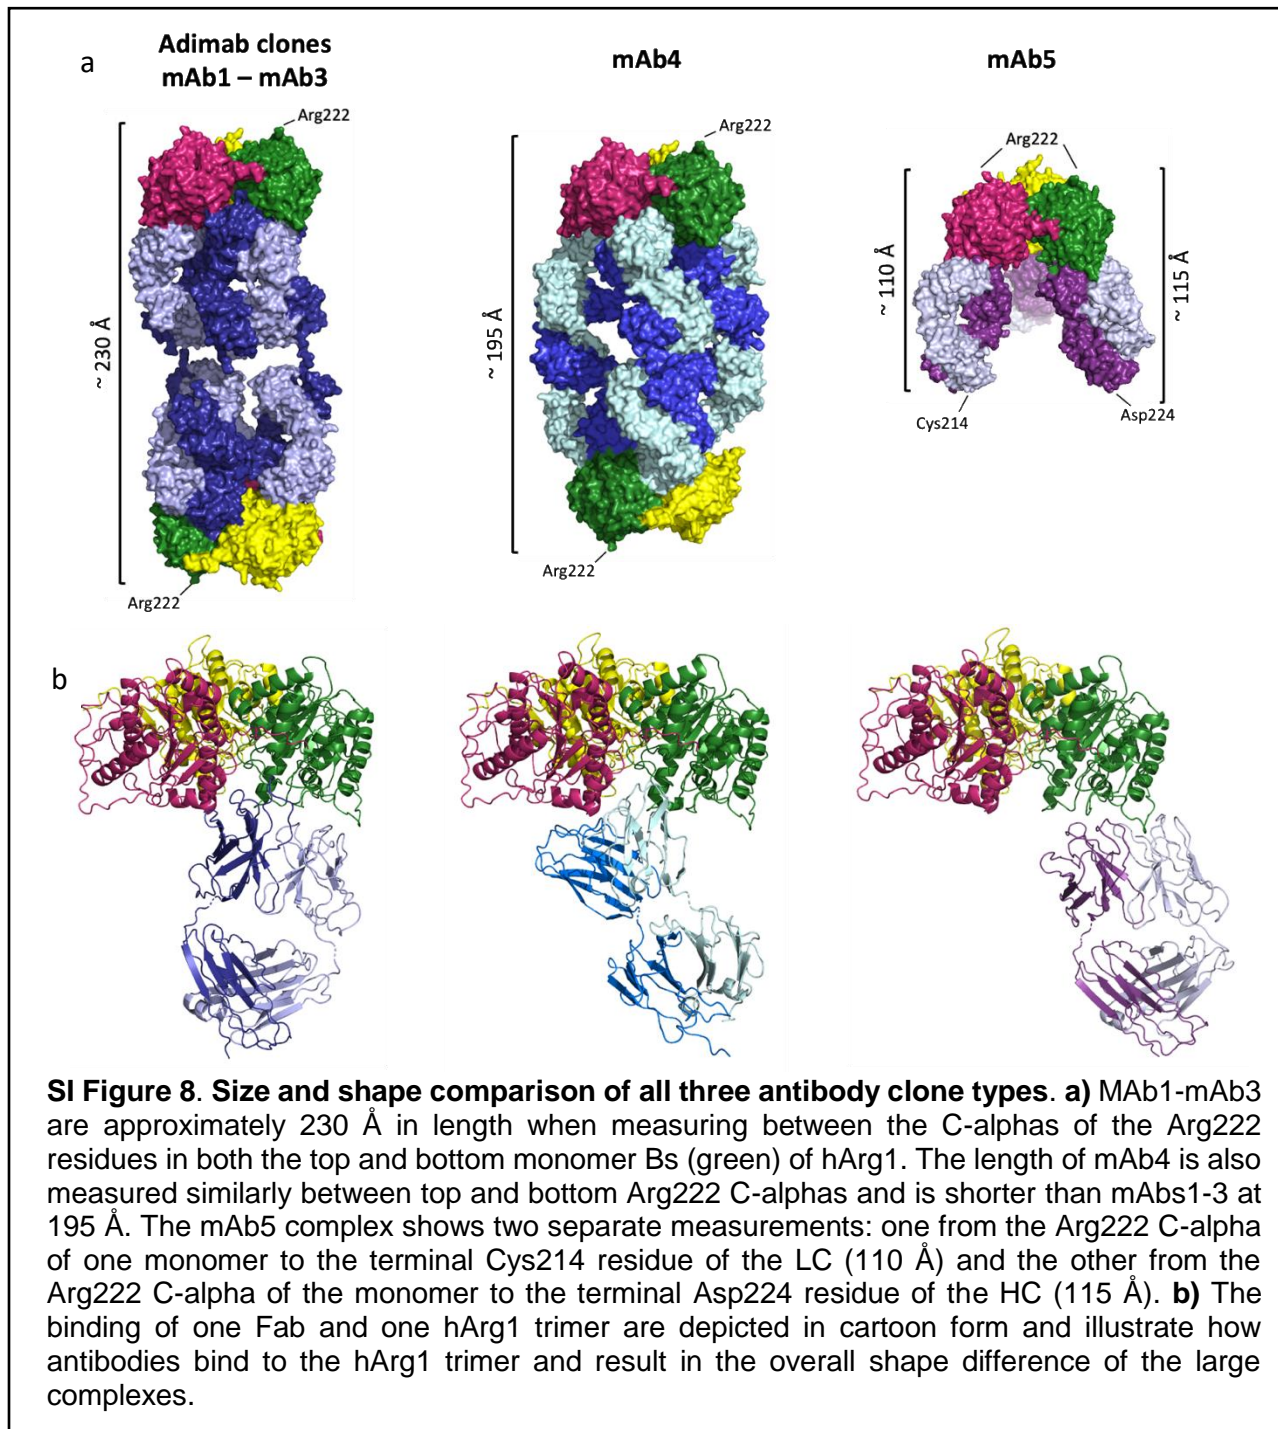

320  
321  
322  
323  
324  
325  
326

327 **Supplementary note 2: Ability of mAb1 to form a 2:2 complex**

328 The immunoglobulin backbones differ between antibodies characterized here and seem  
329 to play a role in the formation of different structure classes identified microscopically. For instance,  
330 while mAbs1-3) all share identical epitope:paratope interactions, only mAb1 exhibited a 2:2  
331 complex. In 2002<sup>12</sup> a fully intact human IgG including the hinge region confirmed that IgG hinges  
332 resemble “loose tethers,” allowing the Fabs to rotate freely while still retaining a covalent link  
333 between the Fab and Fc domains. This flexible linkage, along with the specific antibody:antigen  
334 interactions, leads to the variance in Fab positioning and reach between the complexes.

335 In our study, the extended length of mAbs1-3 are approximately the same resulting in  
336 antibodies which share similar torsional rotations from the top trimer to the bottom. While mAb1  
337 is built on a mouse IgG2a backbone, mAb2 is built on a mouse IgG1 backbone, which have been  
338 shown to be less flexible than the mouse IgG2a backbone hinge regions<sup>13</sup>. This enhanced  
339 flexibility in the IgG2a hinge region may be responsible for allowing the 2:2 complex to form with  
340 mAb1 but not mAb2. A possible scenario is that the 2:2 complex is formed first, followed by an  
341 opening up of first two mAb1s to permit a third mAb1 to bind to one hArg1 trimer and then  
342 eventually to the second hArg1 trimer. With a shorter and more rigid IgG1 backbone for mAb2,  
343 this extreme movement of the hinge is restricted and therefore only 2:3 complexes are seen.  
344 While it’s difficult to compare the murine backbones of mAb1 and mAb2 directly to the human  
345 IgG4 backbone of mAb3, anisotropy decay studies showed that the mean time for decay of murine  
346 IgG2a was shorter than that of human IgG4, hinting at a more flexible murine IgG2a.<sup>13</sup> Therefore,  
347 although not directly assessed in this study, it suggests that the human IgG4 hinge region is more  
348 rigid than murine IgG2a, allowing only the 2:3 complexes to form. Further evidence supporting  
349 the hypothesis that the rigidity of the backbones prohibits the formation of the 2:2 complex is  
350 found in the lack of these complexes in all mAbs on the human IgG4 and mouse IgG1 backbones  
351 in this study.

352

353

354 **Supplementary note 3: Antibody binding affinities to trimeric hArg1 and monomeric hArg1**

355 Four of our five antibodies have interactions spanning across the hArg1 monomeric  
356 interfaces when hArg1 is present in the natural, trimeric form. SPR assays revealed the reduction or  
357 loss of binding potencies of the mAbs when hArg1 was forced into a monomeric state. The affinity  
358 matured mAb3 has numerous interactions with two monomers and we therefore hypothesized that  
359 mAb3 would have drastically reduced binding potency when hArg1 is monomerized. Indeed, while  
360 the binding of mAb3 to trimeric hArg1 was quite potent, measurable binding between mAb3 and  
361 monomeric hArg1 was completely lost (**SI Table 6**). When considering the surface area between  
362 hArg1 and mAb3, one monomer shares 372 Å<sup>2</sup> and 1 salt bridge with mAb3; the other monomer  
363 shares 1020 Å<sup>2</sup> of surface area but no salt bridges (**SI Table 2**). The nearly 75% reduction in shared  
364 surface area or interactions resulted in loss of all measurable mAb interaction.

365 MAb4 also binds across two monomers so a similar loss in potency was expected.  
366 However, the affinity of mAb4 for hArg1 differed only by ~36 fold when hArg1 was monomerized.  
367 Upon monomerization, mAb4 may have the ability to maintain binding to two separate hArg1  
368 monomers. Within one hArg1 monomer, mAb4 shares 974 Å<sup>2</sup> of surface area and two salt bridges.  
369 With the other monomer, mAb4 shares only 576 Å<sup>2</sup> but has five salt bridges with hArg1. Despite  
370 having about 1.5-fold less surface area overlap in one of these mAb4:hArg1 pairs, the addition of  
371 several salt bridges may be enough to maintain binding. Therefore, although clearly losing potency  
372 upon monomerization, this ability to bind to two separate monomers of hArg1 may explain the  
373 conserved potency not seen with mAb3, though we do not have structural data to support this.

374

375

376

377

378

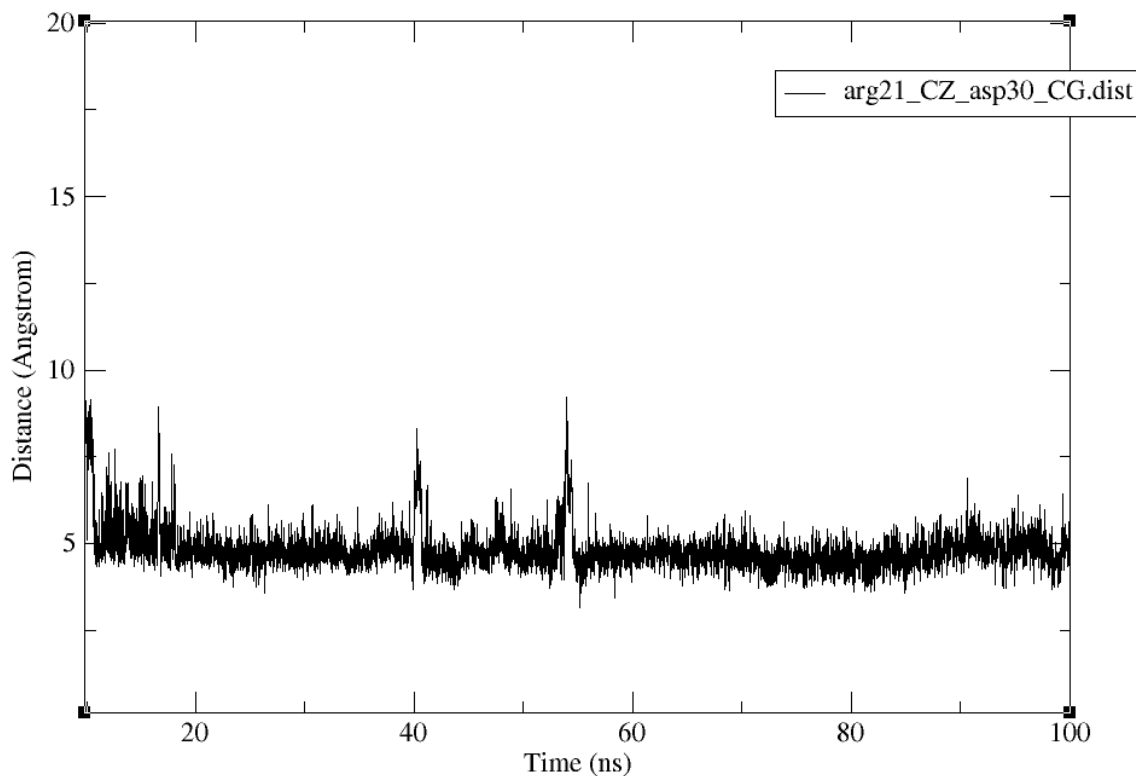

379

380

381 **SI Figure 9:** Distance (Å) over 100 ns of molecular dynamics simulations between hArg1's Arg21  
382 (guanidino C atom CZ) and mAb5's Asp30 (carboxylate C atom CG).

383

384

385

### 386 Supplementary references

- 387 1. Sivasubramanian, A. *et al.* Broad epitope coverage of a human in vitro antibody library. *MAbs* (2017) doi:10.1080/19420862.2016.1246096.
- 388 2. Suloway, C. *et al.* Automated molecular microscopy: The new Legimon system. *J. Struct. Biol.* (2005) doi:10.1016/j.jsb.2005.03.010.
- 389 3. Zheng, S. Q. *et al.* MotionCor2: Anisotropic correction of beam-induced motion for improved cryo-electron microscopy. *Nature Methods* (2017) doi:10.1038/nmeth.4193.
- 390 4. Rohou, A. & Grigorieff, N. CTFFIND4: Fast and accurate defocus estimation from electron micrographs. *J. Struct. Biol.* (2015) doi:10.1016/j.jsb.2015.08.008.
- 391 5. Lander, G. C. *et al.* Appion: An integrated, database-driven pipeline to facilitate EM image processing. *J. Struct. Biol.* (2009) doi:10.1016/j.jsb.2009.01.002.
- 392 6. Punjani, A., Rubinstein, J. L., Fleet, D. J. & Brubaker, M. A. CryoSPARC: Algorithms for rapid unsupervised cryo-EM structure determination. *Nat. Methods* (2017) doi:10.1038/nmeth.4169.
- 393 7. Pettersen, E. F. *et al.* UCSF Chimera - A visualization system for exploratory research and analysis. *J. Comput. Chem.* (2004) doi:10.1002/jcc.20084.
- 394 8. Mitcheltree, M. J. *et al.* Discovery and Optimization of Rationally Designed Bicyclic Inhibitors of Human Arginase to Enhance Cancer Immunotherapy. *ACS Med. Chem. Lett.* **11**, 582–588 (2020).
- 395 9. Emsley, P. & Cowtan, K. Coot: Model-building tools for molecular graphics. *Acta Crystallogr. Sect. D Biol. Crystallogr.* (2004) doi:10.1107/S0907444904019158.

406

- 407 10. Afonine, P. V, Headd, J. J., Terwilliger, T. C. & Adams, P. D. New tool: phenix real space  
408 refine. *Comput. Crystallogr. Newsl.* (2013).
- 409 11. Krissinel, E. & Henrick, K. Inference of Macromolecular Assemblies from Crystalline State.  
410 *J. Mol. Biol.* **372**, 774–797 (2007).
- 411 12. Saphire, E. O. *et al.* Contrasting IgG structures reveal extreme asymmetry and flexibility.  
412 *J. Mol. Biol.* **319**, 9–18 (2002).
- 413 13. Dangi, J. L. *et al.* Segmental flexibility and complement fixation of genetically engineered  
414 chimeric human, rabbit and mouse antibodies. *EMBO J.* **7**, 1989–1994 (1988).
- 415 14. Jorgensen, W. L., Chandrasekhar, J., Madura, J. D., Impey, R. W. & Klein, M. L.  
416 Comparison of simple potential functions for simulating liquid water. *J. Chem. Phys.* (1983)  
417 doi:10.1063/1.445869.
- 418 15. Wang, L. P. *et al.* Building a More Predictive Protein Force Field: A Systematic and  
419 Reproducible Route to AMBER-FB15. *J. Phys. Chem. B* (2017)  
420 doi:10.1021/acs.jpcc.7b02320.
- 421 16. Roe, D. R. & Cheatham, T. E. PTRAJ and CPPTRAJ: Software for processing and analysis  
422 of molecular dynamics trajectory data. *J. Chem. Theory Comput.* (2013)  
423 doi:10.1021/ct400341p.  
424
